# Supplementary material for: Synthesis and characteristics of ZnGa2O4 hollow nanostructures via carbon@Ga(OH)CO3@Zn(OH)2 by a hydrothermal method
Source: Royal Society of Chemistry journal article supplement (doi:10.1039/c4ce02325k), 2015-01-01
Supplement: c4ce02325k1.pdf [file c4ce02325k1.pdf]

## Supporting Information

# Synthesis and characteristics of $\text{ZnGa}_2\text{O}_4$ hollow nanostructures via carbon@Ga(OH)CO<sub>3</sub>@Zn(OH)<sub>2</sub> by hydrothermal method

*Bong Kyun Kang,<sup>a</sup> Hyeong Dae Lim,<sup>a</sup> Sung Ryul Mang,<sup>b</sup> Keun Man Song,<sup>a</sup> Mong Kwon Jung,<sup>c</sup> and Dae Ho Yoon<sup>a,b\*</sup>*

<sup>a</sup> School of Advanced Materials Science and Engineering, Sungkyunkwan University, Suwon 440-746, Republic of Korea,

<sup>b</sup> SKKU Advanced Institute of Nanotechnology (SAINT), Sungkyunkwan University, Suwon 440-746, Republic of Korea,

<sup>c</sup> Hyosung Corporation, R&D Business Labs, Anyang, 431-080, Republic of Korea.

E-mail: dhyoon@skku.edu (D. H. Yoon)

| <b>Sample</b> | <b>Carbon</b> | <b>Concentration of<br/>Ga(NO<sub>3</sub>)<sub>3</sub>•xH<sub>2</sub>O</b> | <b>Urea</b> | <b>Concentration of<br/>(C<sub>4</sub>H<sub>6</sub>O<sub>4</sub>)Zn•2H<sub>2</sub>O</b> | <b>Sovent(water)</b> |
|---------------|---------------|----------------------------------------------------------------------------|-------------|-----------------------------------------------------------------------------------------|----------------------|
| Sample 1      | 150 mg        | 3 mmol                                                                     | 30 mmol     | 2 mmol                                                                                  | 50 mL                |
| Sample 2      | 150 mg        | 3 mmol                                                                     | 30 mmol     | 2.5 mmol                                                                                | 50 mL                |
| Sample 3      | 150 mg        | 3 mmol                                                                     | 30 mmol     | 3 mmol                                                                                  | 50 mL                |
| Sample 4      | 150 mg        | 3 mmol                                                                     | 30 mmol     | 3.5 mmol                                                                                | 50 mL                |

Table S1 Concentration of starting materials for carbon@Ga(OH)CO<sub>3</sub>@Zn(OH)<sub>2</sub> core-shell-shell

NSs.

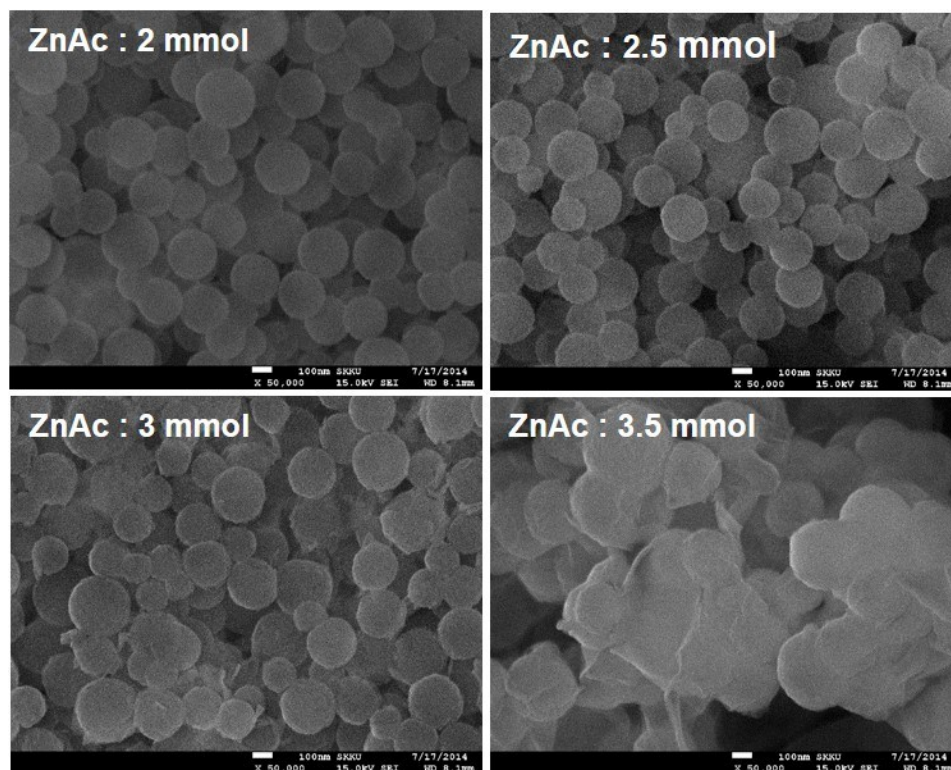

Fig. S1 FESEM images of the carbon@Ga(OH)CO<sub>3</sub>@Zn(OH)<sub>2</sub> core-shell-shell NSs before calcination : concentration of ZnAc: 2, 2.5, 3 and 3.5 mmol.

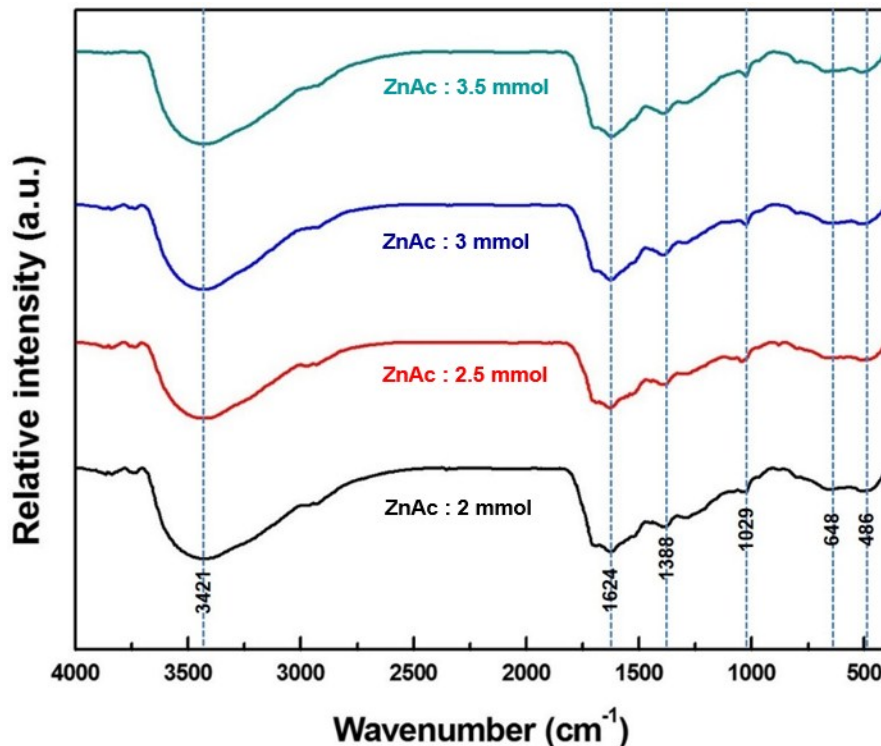

Fig. S2 FTIR spectra of the carbon@Ga(OH)CO<sub>3</sub>@Zn(OH)<sub>2</sub> core-shell-shell NSs before calcination : concentration of ZnAc: 2, 2.5, 3 and 3.5 mmol.

Fig. S2 shows the FTIR spectra in the 4000 ~ 400 cm<sup>-1</sup> region of the carbon@Ga(OH)CO<sub>3</sub>@Zn(OH)<sub>2</sub> core-shell-shell NSs before calcination as a function of ZnAc. The vibration modes at 1600 and 1750 cm<sup>-1</sup> are attributed to the C=O and C=C vibrations by the aromatization of glucose during hydrothermal treatment. The band absorption of carbon@Ga(OH)CO<sub>3</sub>@Zn(OH)<sub>2</sub> core-shell-shell NSs was observed at 1388 cm<sup>-1</sup> due to the  $\nu_3$  mode of interlamellar [CO<sub>3</sub>]<sup>2-</sup> ions according to previous reports.<sup>1</sup> Broad absorption peaks positioned at 486 ~ 648 cm<sup>-1</sup> (Ga-OH and Zn-OH stretching vibration) are identified in the carbon@Ga(OH)CO<sub>3</sub>@Zn(OH)<sub>2</sub> core-shell-shell NSs before calcination.<sup>2-3</sup>

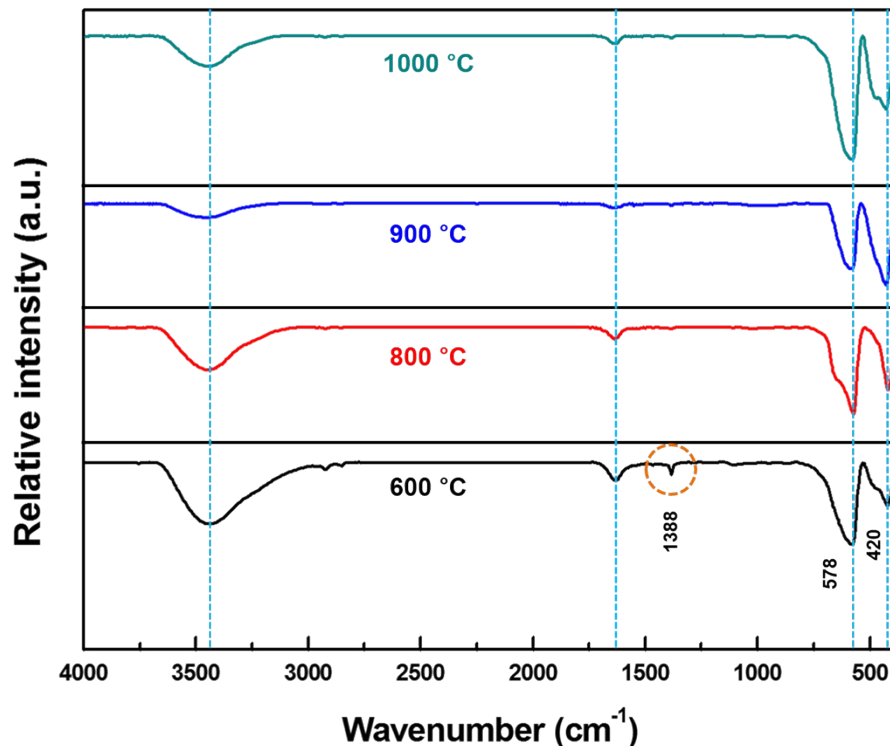

Fig. S3 FTIR spectra of the ZnGa<sub>2</sub>O<sub>4</sub> (ZnAc : 2.5 mmol) hollow NSs after calcination from 600 to 1000 °C for 1 hour in air atmosphere.

The band absorption of ZnGa<sub>2</sub>O<sub>4</sub> hollow NSs at 600 °C for 1 hour was observed at 1388 cm<sup>-1</sup>. It indicated that the component of the shell are consist of residual interlamellar [CO<sub>3</sub>]<sup>2-</sup> anions in Ga(OH)CO<sub>3</sub> shell. Strong absorption peaks positioned at 420 and 578 cm<sup>-1</sup> (Ga-O and Zn-O stretching vibration) in Fig. S3 are identified in the ZnGa<sub>2</sub>O<sub>4</sub> hollow NSs.<sup>4</sup> Furthermore, the FTIR spectra show a broad absorption band of the -OH group (1631, 3436 cm<sup>-1</sup>), which results from the H<sub>2</sub>O absorbed by the ZnGa<sub>2</sub>O<sub>4</sub> hollow NSs when the samples were analyzed at room temperature in the air.

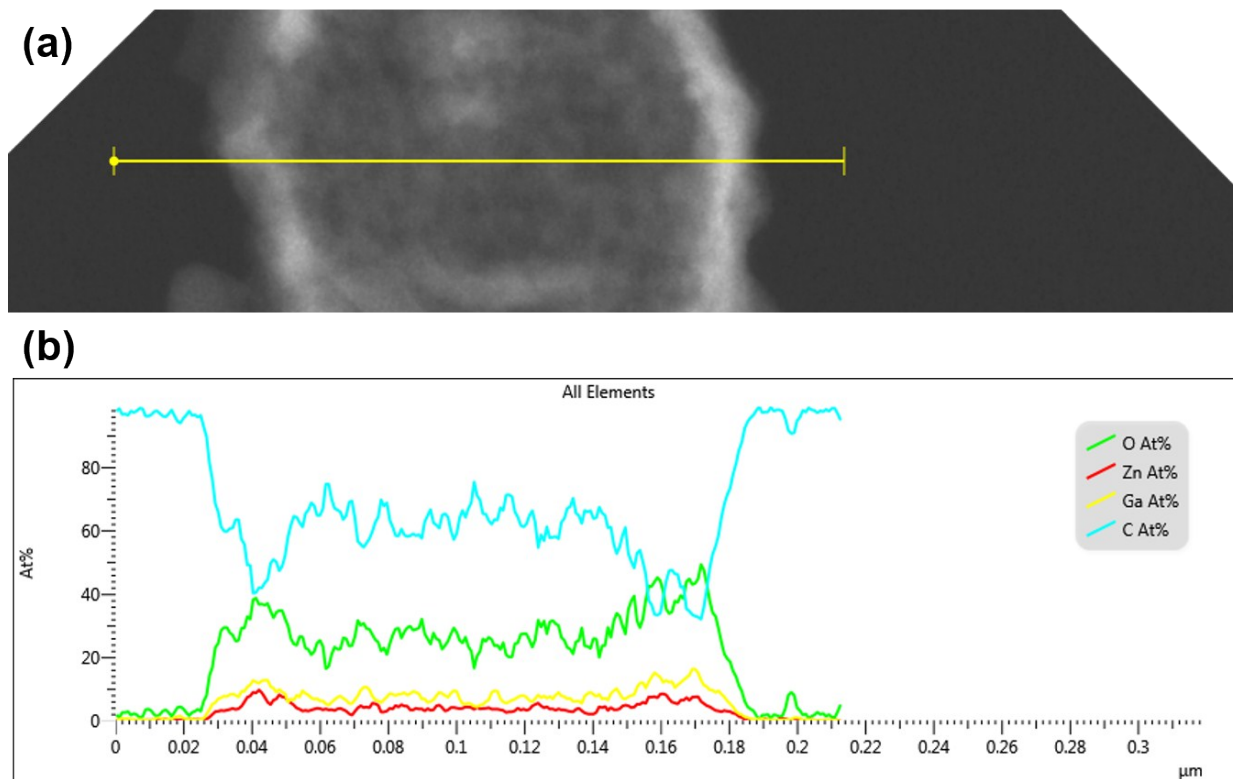

Fig. S4 The STEM (a) image and the EDS (b) line scan of  $\text{ZnGa}_2\text{O}_4$  ( $\text{ZnAc} : 2.5 \text{ mmol}$ ) hollow NSs. EDS line scan taken along the indicated lines shown in the STEM image.

The formation of  $\text{ZnGa}_2\text{O}_4$  hollow NSs was verified again by scanning TEM (STEM) image and the elemental line scanning profile in Fig. S4 (a) and (b). The presence of Ga and Zn in the same edge region can be attributed to the formation of  $\text{ZnGa}_2\text{O}_4$  shell.

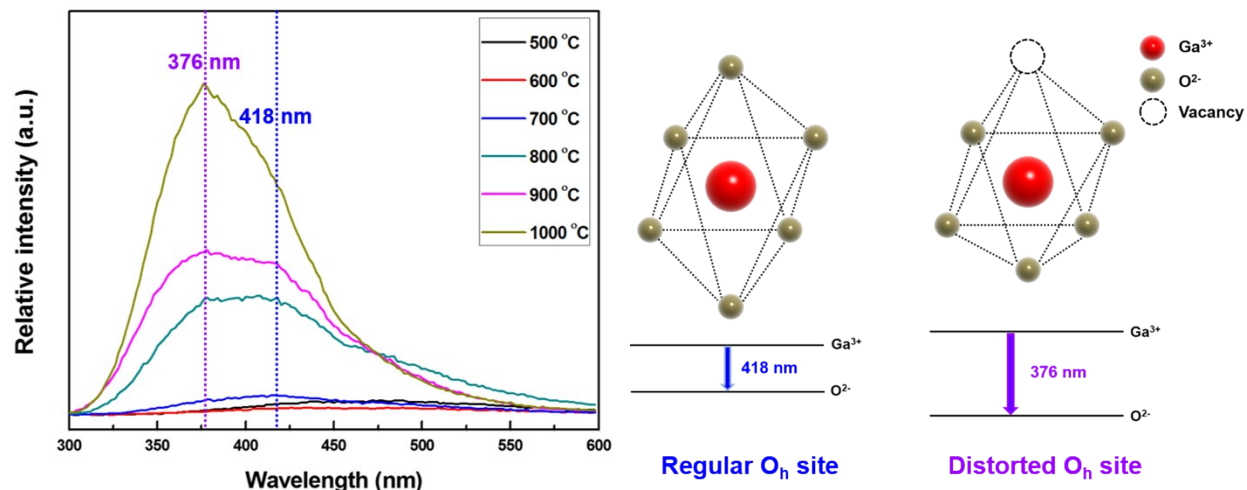

Fig. S5 CL (a) spectra and representative band-structure scheme (b) for the UV and blue luminescence in  $\text{ZnGa}_2\text{O}_4$  (ZnAc : 2.5 mmol) hollow nanostructures.

## References

- 1 L. S. Esteban, G. S. Mayela, R. G. Ma. Luisa, S. Isaac, *J. Porous Mat.*, 1996, **3**, 169.
- 2 H. D. Lutz, C. Jung, R. Mörtel, H. Jacobs, R. Stahl, *Spectrochim. Acta A*, 1998, **54**, 893.
- 3 V. A. Macrae, A. J. Downs, *Phys. Chem. Chem. Phys.*, 2004, **6**, 4571.
- 4 M. Yu, J. Lin, Y. H. Zhou, S. B. Wang, *Mater. Lett.*, 2002, **56**, 1007.
